# Supplementary material for: A Core and Valence-Level Spectroscopy Study of the Enhanced Reduction of CeO2 by Iron Substitution—Implications for the Thermal Water-Splitting Reaction
Source: MDPI journal article supplement (doi:10.3390/inorganics12020042), 2024-01-27
Supplement: s1 [file s1]

## A Core and Valence-Level Spectroscopy Study of the Enhanced Reduction of CeO<sub>2</sub> by Iron Substitution—Implications for the Thermal Water-Splitting Reaction

Hicham Idriss

Karlsruhe Institute of Technology (KIT), 76344 Eggenstein-Leopoldshafen, Germany

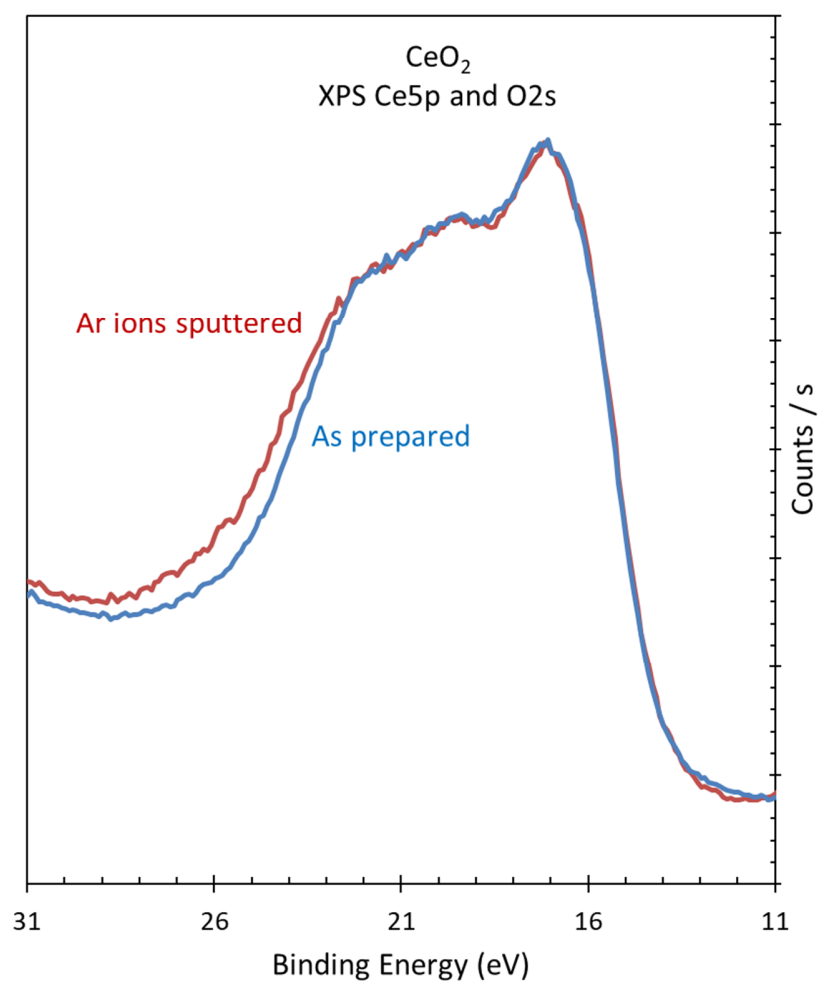

Figure S1.

Normalized XPS Ce5p and O2s of as prepared CeO<sub>2</sub> and after 5-minute argon ions sputtering.

## Supporting Information

A

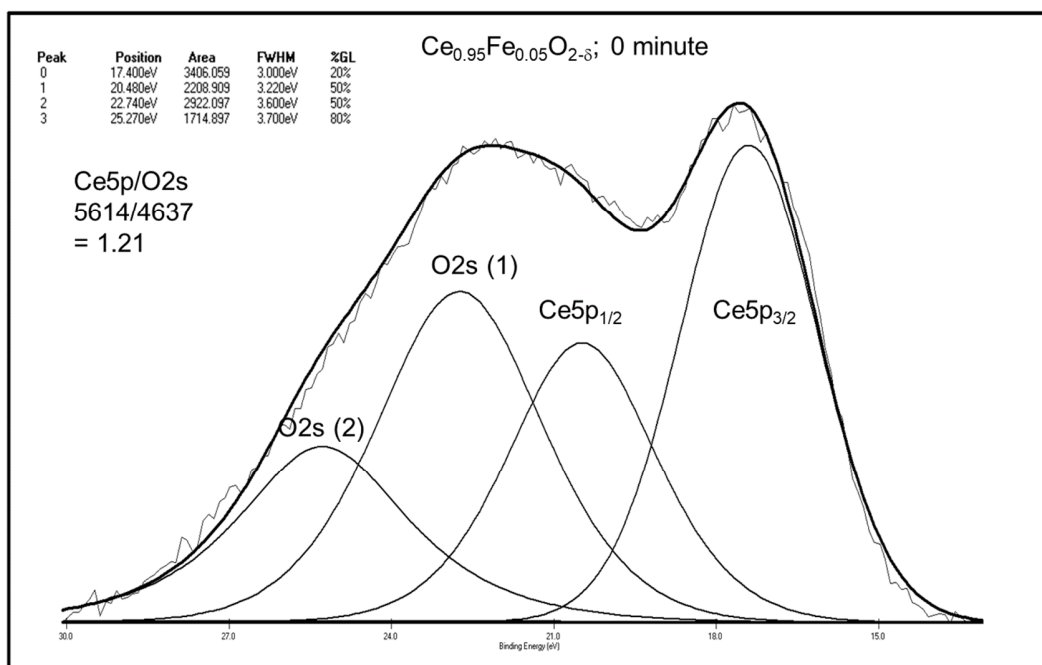

B

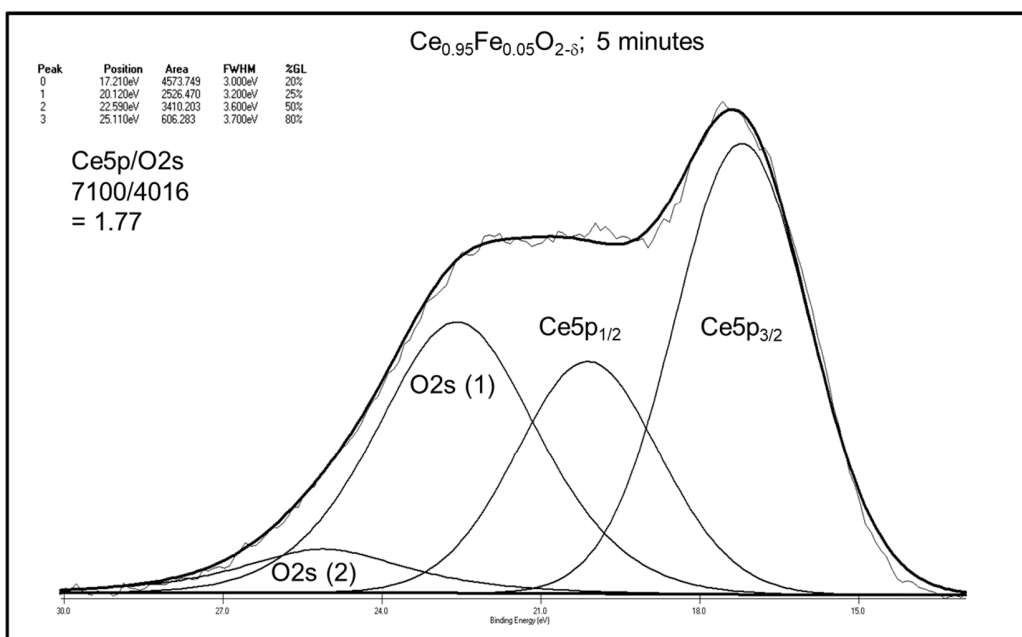

## Supporting Information

C

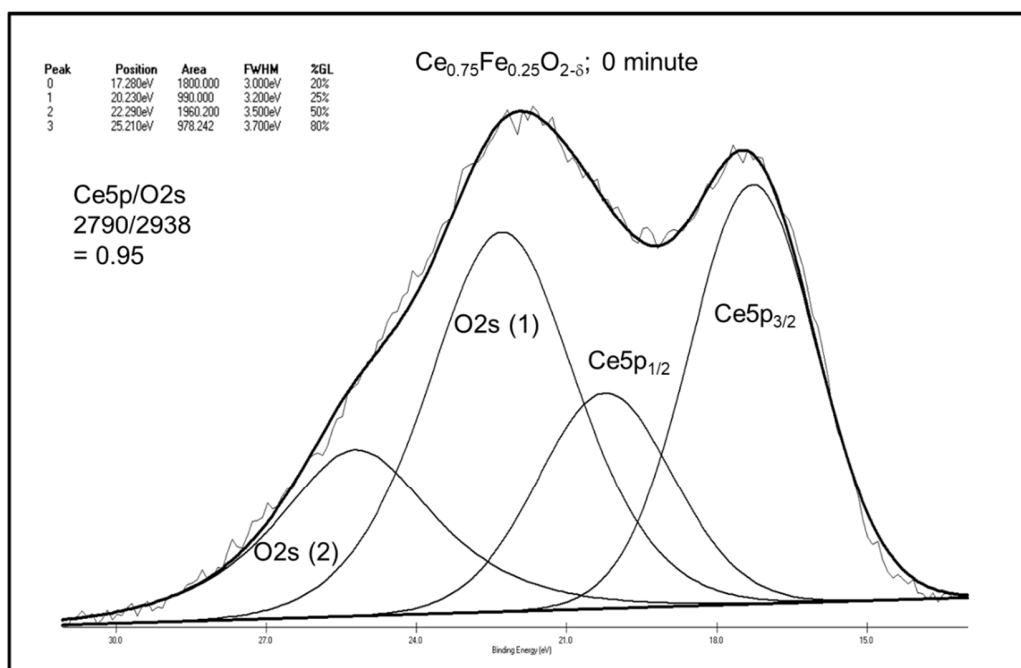

D

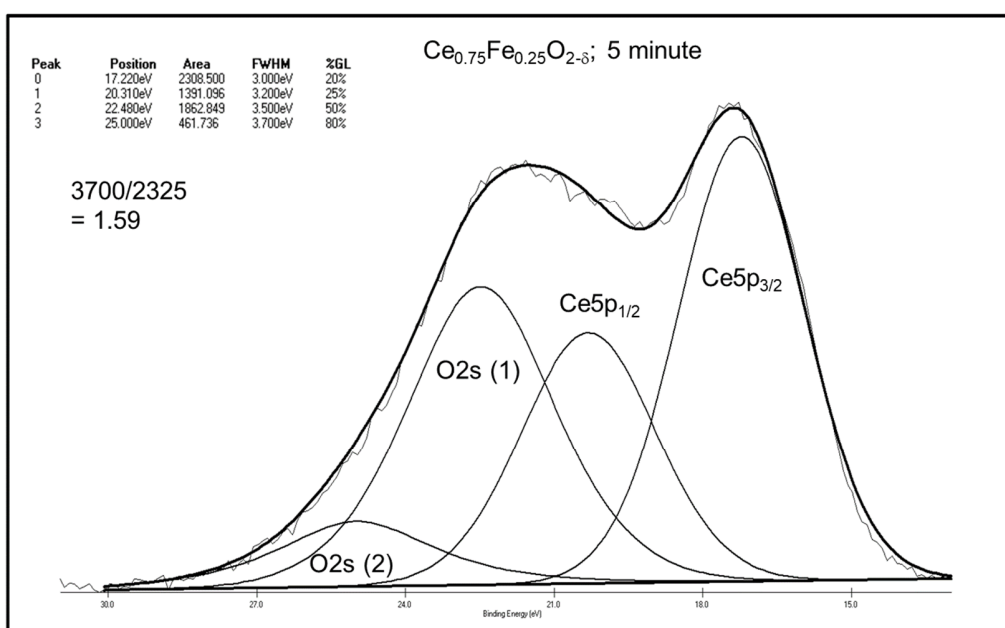

## Supporting Information

### Figure S2

Curve fitting of the XPS Ce5p and O2s peaks for the fresh A and C and Argon ions sputtered B and D  $\text{Ce}_{0.95}\text{Fe}_{0.05}\text{O}_{2-\delta}$  and  $\text{Ce}_{0.75}\text{Fe}_{0.25}\text{O}_{2-\delta}$ , respectively.
